# Supplementary material for: Phase-selective synthesis of cubic WN and hexagonal WC carbide via solid–phase reaction pathways controlling for electrochemical applications
Source: Royal Society of Chemistry journal article supplement (doi:10.1039/d5ta08777e), 2025-12-31
Supplement: d5ta08777e1.pdf [file d5ta08777e1.pdf]

# 1 ***Supplementary Information***

## 2 **Phase Selective Synthesis of Cubic WN and Hexagonal WC** 3 **Carbide via Solid-phase Reaction Pathways Controlling for** 4 **Electrochemical Applications**

5 Zheng-Hua He <sup>a,b,1</sup>, Jian-Fei Gao <sup>a,b,1</sup>, Yan-Dong Ma <sup>a,b</sup>, Jing-Feng Hou <sup>a,b</sup>, Zhe Li <sup>a,b</sup>,  
6 Ling-Bin Kong <sup>a, b, \*</sup>

7 <sup>a</sup> State Key Laboratory of Advanced Processing and Recycling of Non-ferrous  
8 Metals, Lanzhou University of Technology, Lanzhou 730050, P. R. China

9 <sup>b</sup> School of Materials Science and Engineering, Lanzhou University of Technology,  
10 Lanzhou 730050, P. R. China

11 \* Corresponding author. E-mail: [konglb@lut.edu.cn](mailto:konglb@lut.edu.cn)

12 1 These authors contributed equally: Zheng-Hua He, Jian-Fei Gao.

### 13 **1. Experimental**

#### 14 **1.1. Chemicals and materials**

15 All the reagents used in the experiment were of analytical grade and used  
16 without further purification. Tungsten trioxide (WO<sub>3</sub>, >99%), Dicyandiamide  
17 (C<sub>2</sub>H<sub>4</sub>N<sub>4</sub>), were purchased from Sinopharm Chemical Reagent Co. Ltd. Deionized  
18 water with a resistivity of > 10.0 MΩ was used in experiments.

#### 19 **1.2. Material characterization**

20 Crystal structures of WO<sub>3</sub>, WN and WC/C were characterized using X-ray  
21 diffraction (XRD, Rigaku, D/MAX2400) with Cu K<sub>α</sub> radiation (wave length  
22 0.15418 nm) operating at 40 kV and 60 mA. X-ray photoelectron spectroscopy

1 (XPS) was recorded by the PHI5702 multi-function electronic energy  
2 spectrometer. Morphologies, structures and elemental compositions were  
3 monitored by scanning electron microscope (SEM, JEOL JSM-6701F),  
4 transmission electron microscope (TEM, JEOL JEM-2010). Energy dispersive  
5 spectroscopy (EDS) coupled with SEM is performed for elemental analysis. The  
6 thermogravimetric analysis (TGA) of samples was conducted under air  
7 atmosphere at a heating rate of  $10\text{ }^{\circ}\text{C min}^{-1}$  from  $20\text{ }^{\circ}\text{C}$  to  $1000\text{ }^{\circ}\text{C}$  using a thermal  
8 analyzer (TGA, Netzsch 209F3). The existence of free carbon in tungsten nitride  
9 and tungsten carbide was detected by Raman spectrometer (Renishaw invia  
10 spectrometer).

### 11 1.3. Electrode preparation

12 The WN and WC/C anodes were prepared by mixing the active material (80  
13 wt.%), super C (10 wt.%), and the binder PVDF (10 wt.%) were mixed in N-  
14 methyl pyrrolidone to form slurry, and then the slurry was coated on the clean  
15 copper foil collector, followed by drying at  $60\text{ }^{\circ}\text{C}$  for 8 h and then transferred to a  
16 vacuum drying chamber at  $60\text{ }^{\circ}\text{C}$  for 12 h. The mass loading of electrode material  
17 coated each circular electrode was  $0.7\sim 1.3\text{ mg}$ .

### 18 1.4. Electrochemical evaluation

19 The electrochemical performance of electrode material was investigated  
20 with a coin-type configuration. For half-cells tests, this were assembled using  
21 electrode material as anodes and Li foils as reference electrode and counter  
22 electrode into a coin cells (CR2032), where the electrolyte was  $1.0\text{ M LiPF}_6$   
23 dissolved in EC/EMC/DMC mixture ( $v/v/v = 1:1:1$ ) and Celgard 2400 as the  
24 separator. In this work, the electrode is cut into small round plates with a  
25 diameter of 14 mm, and the load of active material on the small round plates is  
26 within the range of  $0.7\text{--}1.3\text{ mg}$ . The cell was done in a glovebox which was full of  
27 Ar. The Li-ion hybrid supercapacitor was tested the same as the half cell. All the  
28 electrochemical tests were carried out at room temperature. Cyclic  
29 voltammetry (CV) and galvanostatic charge-discharge (GCD) were recorded  
30 using an electrochemical workstation (CHI660D, shanghai,China). Electrical

1 impedance spectroscopy (EIS) measurement was measured Autolab (metrohm).  
 2 The Galvanostatic Intermittent Titration Technique (GITT), cycling charge-  
 3 discharge test of half-cells and Li-ion hybrid supercapacitor were measured  
 4 using a CT2001A cell test instrument (LADN Electronic Co.,China).

## 5 1.5. Dynamic calculation formula

6  $i = av^b$  .....S1

7  $\log(i) = \log(a) + b\log(v)$  .....S2

8 In which a is a constant and b is an exponent of power-law. According to the  
 9 peak of cathode and anode, the slope of log (peak current) vs. log (scan rate)  
 10 curve is b value. Based on the experimental b value, the dynamics of charge  
 11 storage mechanism can be qualitatively determined. This is a capacitive behavior  
 12 when b is 1. When b is 0.5, it is a kind of diffusion control process.

13  $i_{(v)} = k_1v + k_2v^{1/2}$  .....S3

14  $i_{(v)}/v^{1/2} = k_1v^{1/2} + k_2$  .....S4

15 In which  $k_1$  and  $k_2$  represent proportional constants of the pseudocapacitor  
 16 behavior control and battery behavior control processes, respectively.

17  $D = \frac{R^2T^2}{2A^2n^4F^4C^2\sigma^2}$  .....

18 .S5

19  $Z_w = R_e + R_{ct} + \sigma\omega^{-1/2}$  .....

20 S6

21 In which ideal gas constant, absolute temperature, effective surface area of

1 electrode in lithium-ion battery, transferred charge number, Faraday constant,  
 2 lithium-ion concentration in the system and Warburg coefficient are expressed  
 3 by R, T, A, n, F, C and  $\sigma$  respectively.

$$4 \quad D_{Li^+} = \frac{4(m_B V_M)}{\pi \left( \frac{M_B S}{\tau (dE_\tau / d\sqrt{\tau})} \right)^2} \left( \frac{\Delta E_s}{\tau (dE_\tau / d\sqrt{\tau})} \right)^2 \left( \tau \ll \frac{L^2}{D_{Li^+}} \right) \dots\dots\dots S$$

5 7

$$6 \quad D_{Li^+} = \frac{4(m_B V_M)}{\pi \tau \left( \frac{M_B S}{\Delta E_\tau} \right)^2} \left( \frac{\Delta E_s}{\Delta E_\tau} \right)^2 \dots\dots\dots S$$

7 8

8 In which  $V_M$ ,  $m_B$ ,  $M_B$ ,  $S$ ,  $L$ ,  $\tau$ ,  $\Delta E_s$  and  $\Delta E_t$  in the above Equation stand for  
 9 molar volume, active material weight, molar mass, contact surface area, average  
 10 thickness of the electrode, relaxation time, the difference of potential change  
 11 caused by pulse and potential change value during relaxation time, respectively.

## 12 1.6. Other related explanations

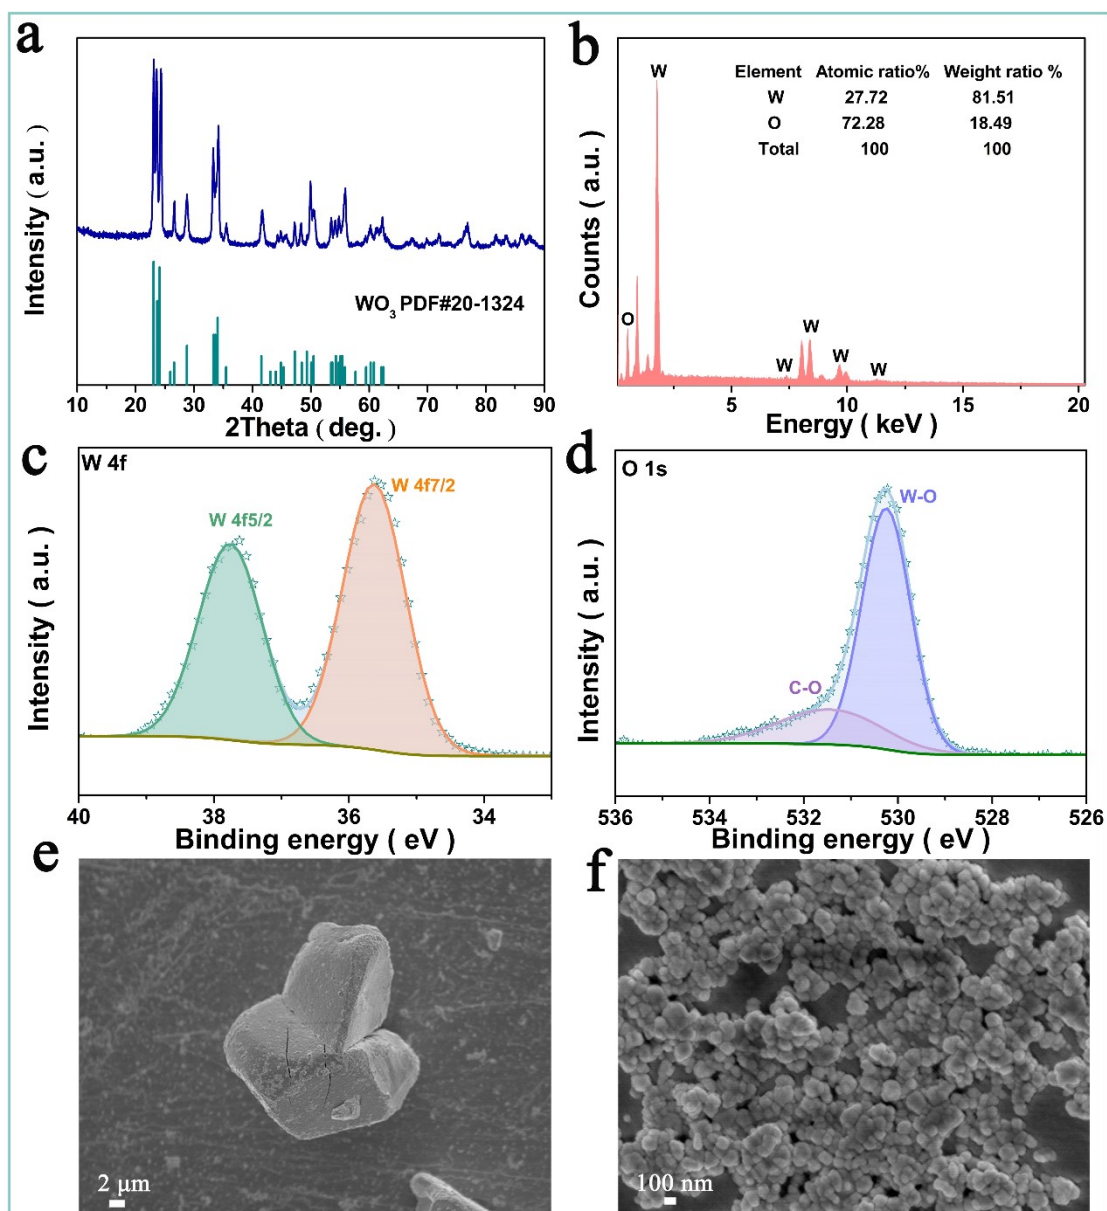

1  
2 **Figure S1.** Phase and morphology characterization of the precursor WO<sub>3</sub>. (a)  
3 XRD; (b) EDS; (c) XPS spectrum of W 4f; (d) O 1s; (e-f) SEM.

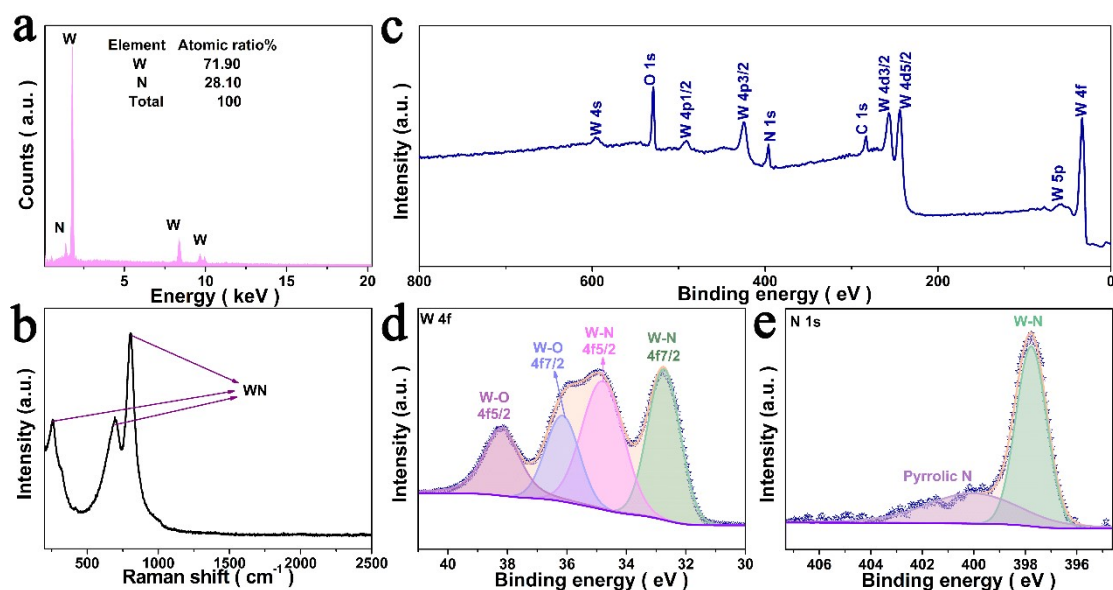

1  
2 **Figure S2.** Phase characterization. WN: (a) EDS spectra; (b) Raman scattering; (c)  
3 broad-scan XPS; (d) HR W 4f spectra; (e) HR N 1s spectra.

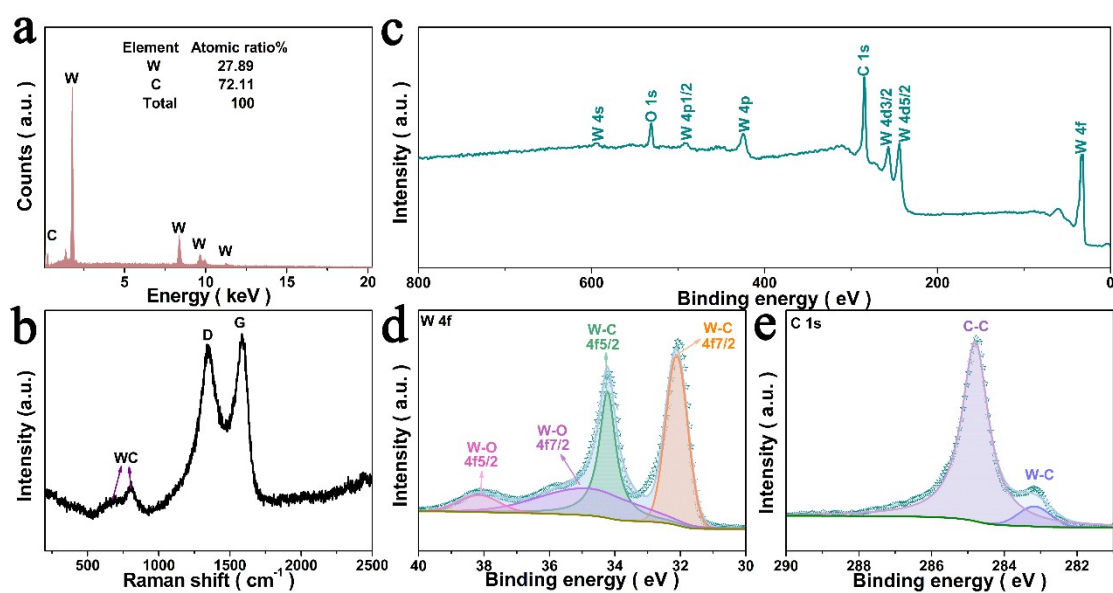

4  
5 **Figure S3.** Phase characterization. WC/C: (a) EDS spectra; (b) Raman scattering;  
6 (c) broad-scan XPS; (d) HR W 4f spectra; (e) HR C 1s spectra.

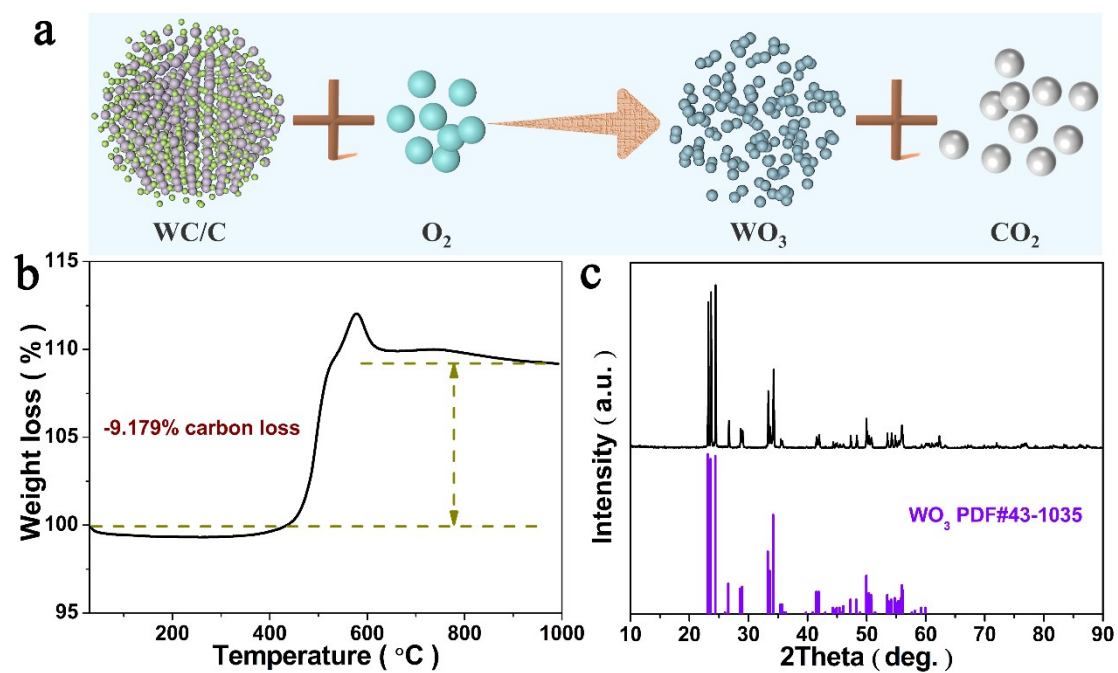

1  
2 **Figure S4.** TGA curve of WC/C material: (a) Illustration of the TGA mechanism;  
3 (b) TGA curves; (c) XRD of the WC/C after TGA.

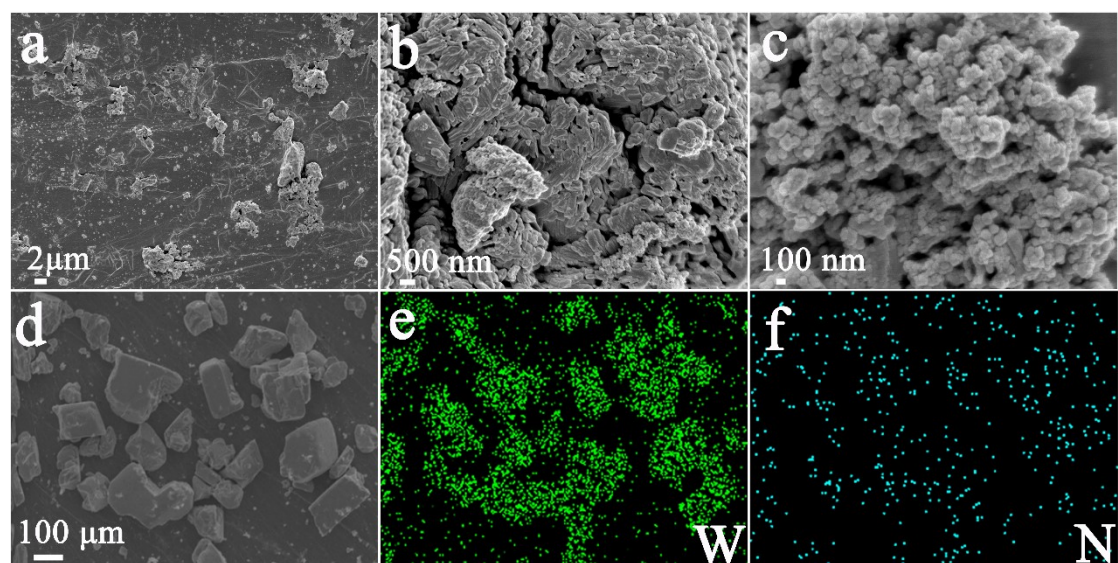

4  
5 **Figure S5.** Morphological characterization. WN: (a-c) SEM; (d) EDS mapping; (e)  
6 W; (f) N.



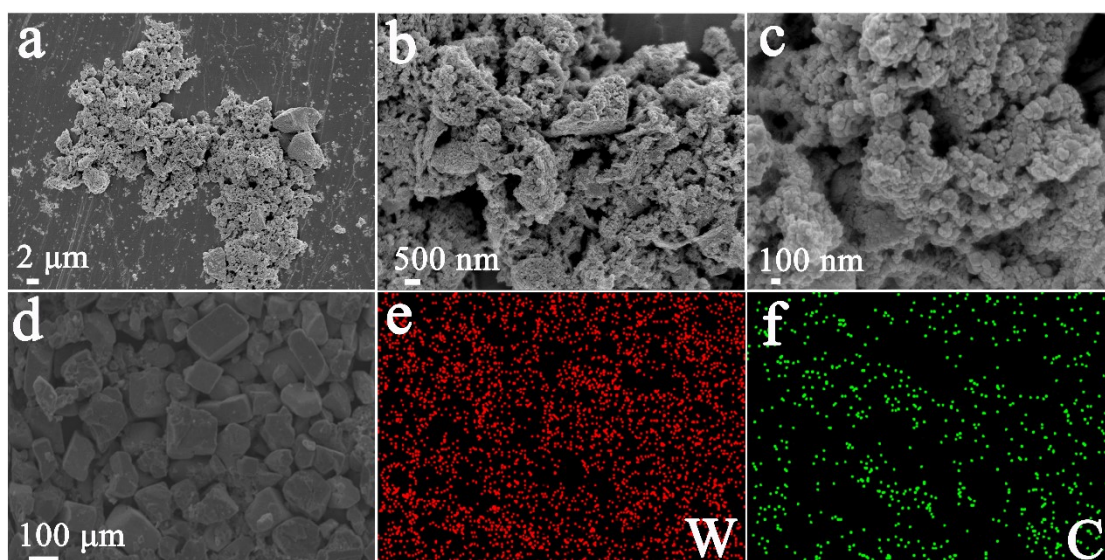

1  
2 **Figure S6.** Morphological characterization. WC/C: (a-c) SEM; (d) EDS mapping;  
3 (e) W.

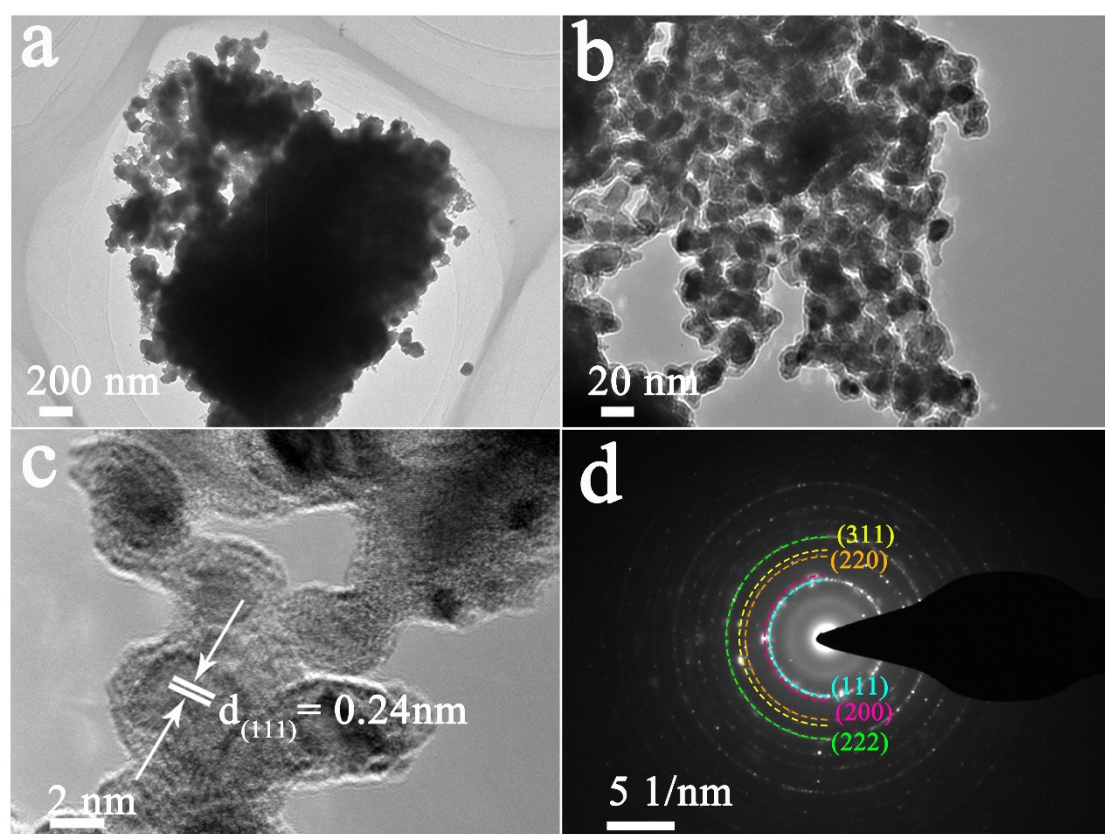

4  
5 **Figure S7.** Morphological characterization. WN: (a-b) TEM; (c) HRTEM; (d) SAED.



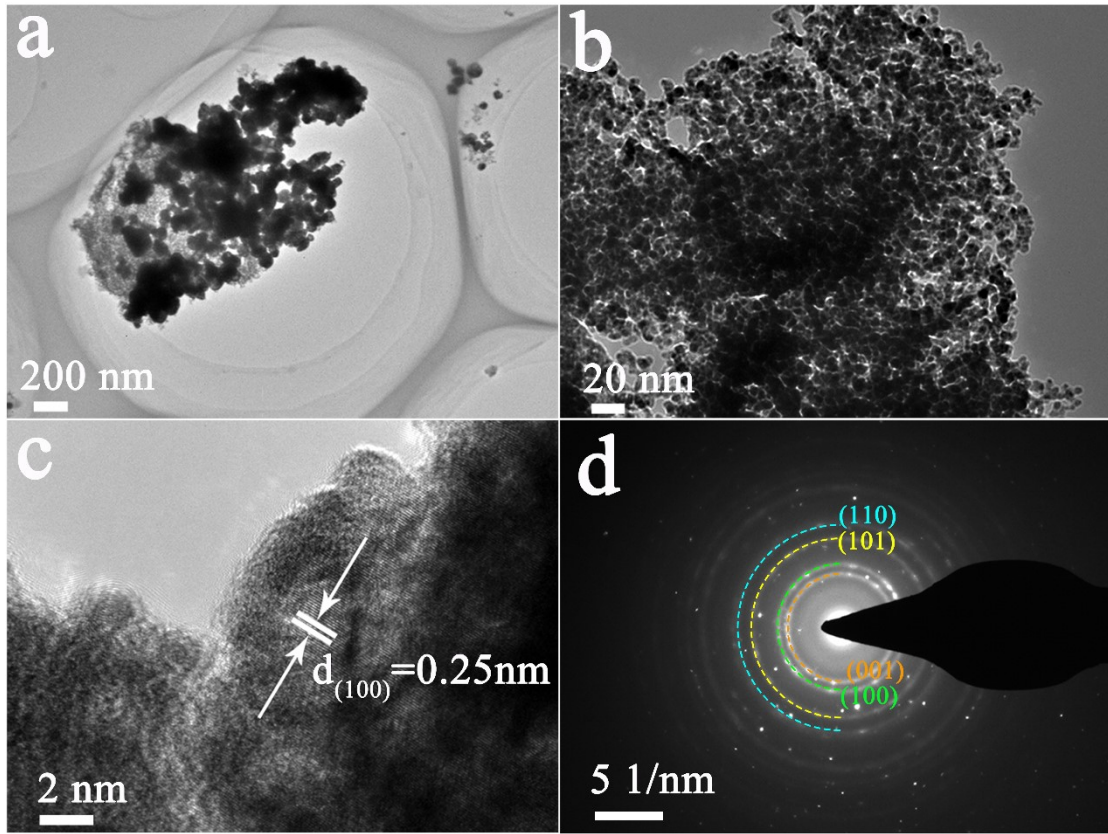

1  
2 **Figure S8.** Morphological characterization. WC/C: (a-b) TEM; (c) HRTEM; (d)  
3 SAED.

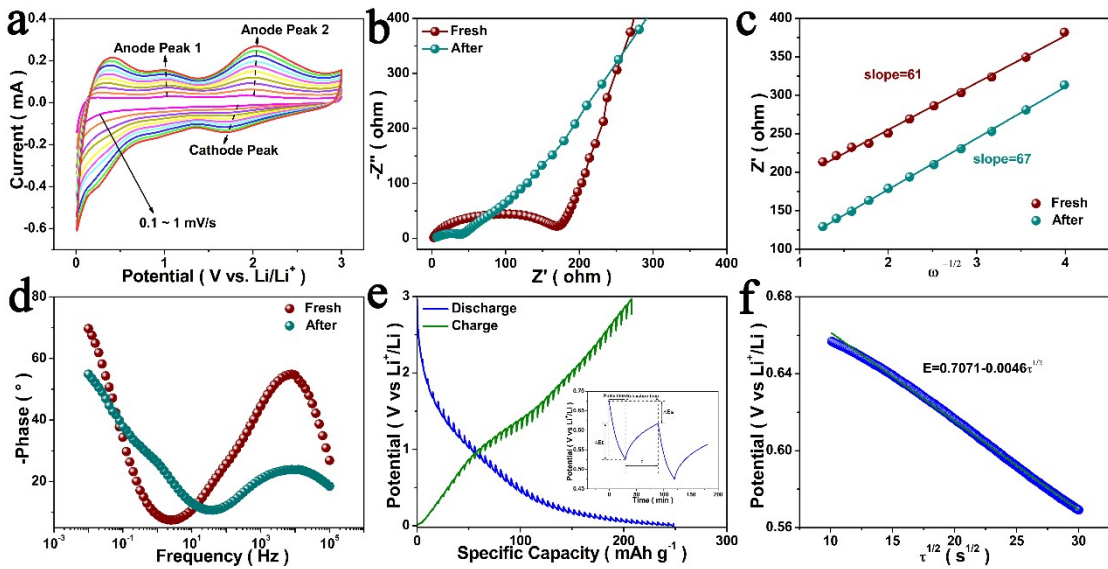

4  
5 **Figure S9.** Dynamic investigation of WN. (a) CV; (b) EIS; (c) Warburg analysis; (d)  
6 Bode diagrams; (e) GITT, Dual sequential titrations within a selected potential  
7 window (inset); (f)  $\tau^{1/2}$  vs.  $V$  linear fit from a single titration.

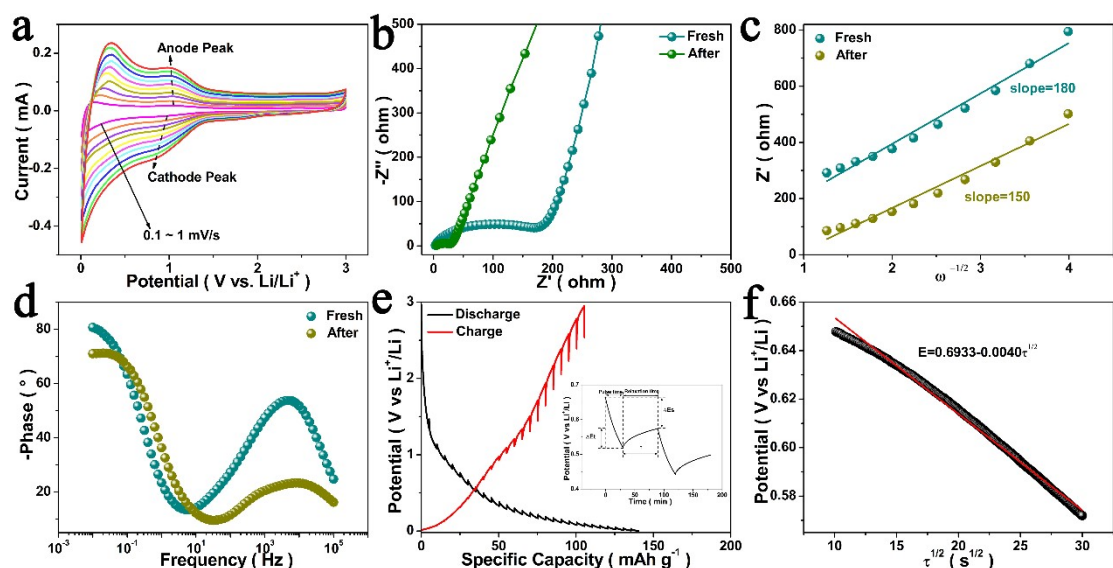

1  
2 **Figure S10.** Dynamic investigation of WC/C. (a) CV; (b) EIS; (c) Warburg analysis;  
3 (d) Bode diagrams; (e) GITT, Dual sequential titrations within a selected  
4 potential window (inset); (f)  $\tau^{1/2}$  vs. V linear fit from a single titration.

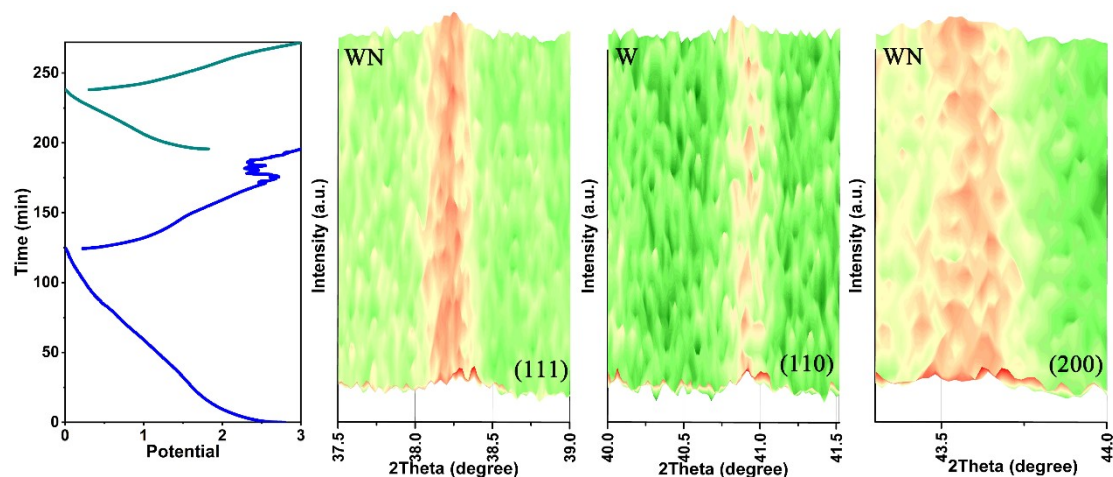

5  
6 **Figure S11.** In-situ XRD of WN in the first and second cycles.

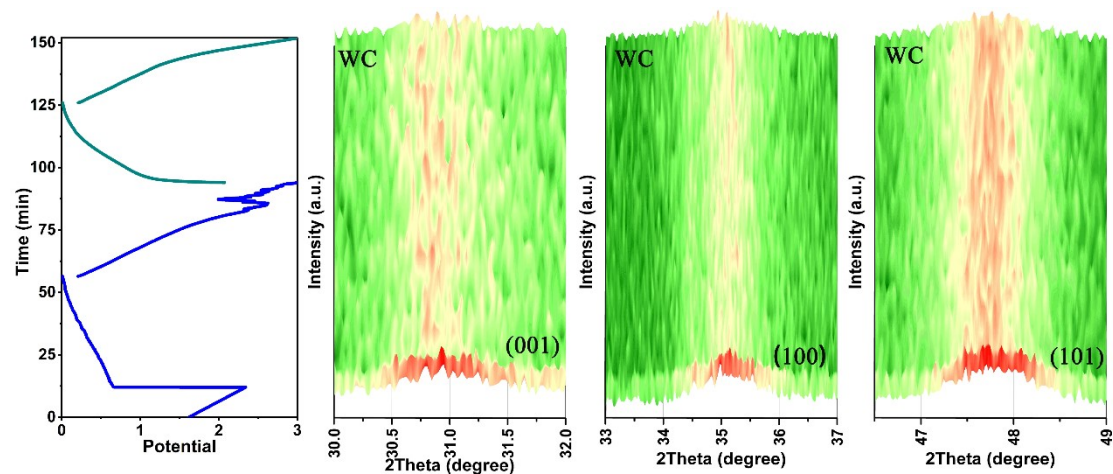

7  
8 **Figure S12.** In-situ XRD of WC/C in the first and second cycles.

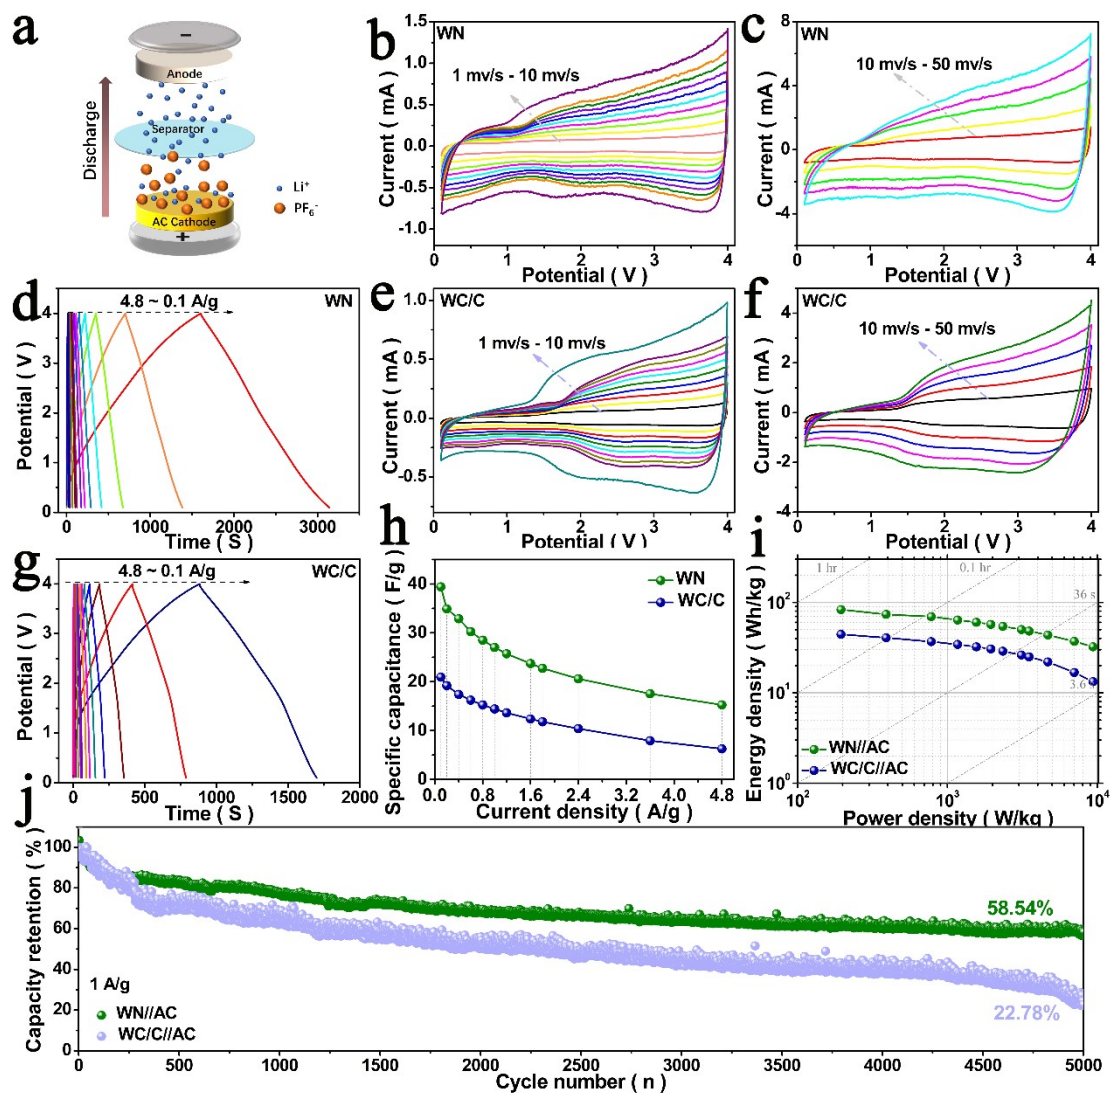

**Figure S13.** Electrochemical characteristics of WN//AC and WC/C//AC LICs. (a) Working-principle schematic; (b,e) CV recorded at low scan rates; (c,f) CV recorded at high scan rates; (d,g) GCD; (h) capability; (i) Energy-power diagram; (j) Extended cycling stability plot.

**Table S1.** The cell parameters of WN and WC/C obtained from Rietveld refinement of powder XRD data using GSAS-II.

| Samples | a (Å)   | b (Å)   | c (Å)   | V (Å <sup>3</sup> ) | R <sub>wp</sub> | R <sub>p</sub> | χ <sup>2</sup> |
|---------|---------|---------|---------|---------------------|-----------------|----------------|----------------|
| WN      | 4.13903 | 4.13903 | 4.13903 | 70.908078           | 10.99%          | 8.72%          | 1.56           |
| WC/C    | 2.90410 | 2.90410 | 2.83750 | 20.724766           | 14.61%          | 11.19%         | 2.49           |

1 Table S2. Cyclability comparison of as-assembled WN//AC and WC/C//AC LIC  
 2 with previously reported LICs in literature

| LIC<br>Anode//Cathode                   | Specific<br>capacity<br>(F g <sup>-1</sup> ) | Energy density<br>(Wh kg <sup>-1</sup> ) | Voltage<br>window<br>(V) | Capacity<br>retention(%)                 |
|-----------------------------------------|----------------------------------------------|------------------------------------------|--------------------------|------------------------------------------|
| Fe <sub>3</sub> C@DRC//AC <sup>1</sup>  | 84.5 at 0.1A g <sup>-1</sup>                 | 187.8 at 200 W kg <sup>-1</sup>          | 0-4                      | 84.8-6000 cycles-<br>1 A g <sup>-1</sup> |
| p-NbN//APDC <sup>2</sup>                | 67.2 at 0.1A g <sup>-1</sup>                 | 149 at 200 W kg <sup>-1</sup>            | 0-4                      | 95-15000 cycles-<br>1 A g <sup>-1</sup>  |
| NbN/GNSs//APDC <sup>3</sup>             | 65 at 0.1A g <sup>-1</sup>                   | 136 at 250 W kg <sup>-1</sup>            | 1-4                      | 84-2000 cycles-5<br>A g <sup>-1</sup>    |
| Mo <sub>2</sub> C@NCB//NCB <sup>4</sup> | 47 at 0.1A g <sup>-1</sup>                   | 104 at 200 W kg <sup>-1</sup>            | 0-4                      | 80-10000 cycles-<br>5 A g <sup>-1</sup>  |
| WN//AC                                  | 39.41 at 0.1A<br>g <sup>-1</sup>             | 83.25 at 195 W kg <sup>-1</sup>          | 0.1-4                    | 58.54-5000<br>cycles-1 A g <sup>-1</sup> |
| WC/C//AC                                | 20.95 at 0.1A<br>g <sup>-1</sup>             | 44.25 at 195 W kg <sup>-1</sup>          | 0.1-4                    | 22.78-5000<br>cycles-1 A g <sup>-1</sup> |

#### 4 References

1. J. Li, X. Jin, Y.-X. Hu, C. Lu, Y.-S. Zhang, B.-M. Zhang, L.-B. Kong and M.-C. Liu,  
*Ionics*, 2020, **26**, 23-31.
2. P. Wang, R. Wang, J. Lang, X. Zhang, Z. Chen and X. Yan, *Journal of Materials  
 Chemistry A*, 2016, **4**, 9760-9766.
3. Z.-K. Chen, J.-W. Lang, L.-Y. Liu and L.-B. Kong, *RSC Advances*, 2017, **7**,  
 19967-19975.
4. X. Liu, X. Zhang, Y. Dou, P. Mei, X. Ma and Y. Yang, *Chemical  
 Communications*, 2021, **57**, 4966-4969.
